# Supplementary material
Source: publisher figshare collection journal article supplement (https://acs.figshare.com/ndownloader/files/10530550)
Supplement: Supplementary file 1 [file 10530550]

## Supporting Information

# PHENOLIC NAPHTHOXAZINES AS CURING PROMOTERS FOR BENZOXAZINES

Gizem Kaya<sup>1</sup>, Baris Kiskan<sup>1,\*</sup>, Yusuf Yagci<sup>1,\*</sup>

<sup>1</sup>*Istanbul Technical University, Department of Chemistry, 34469, Maslak, Istanbul, Turkey.*

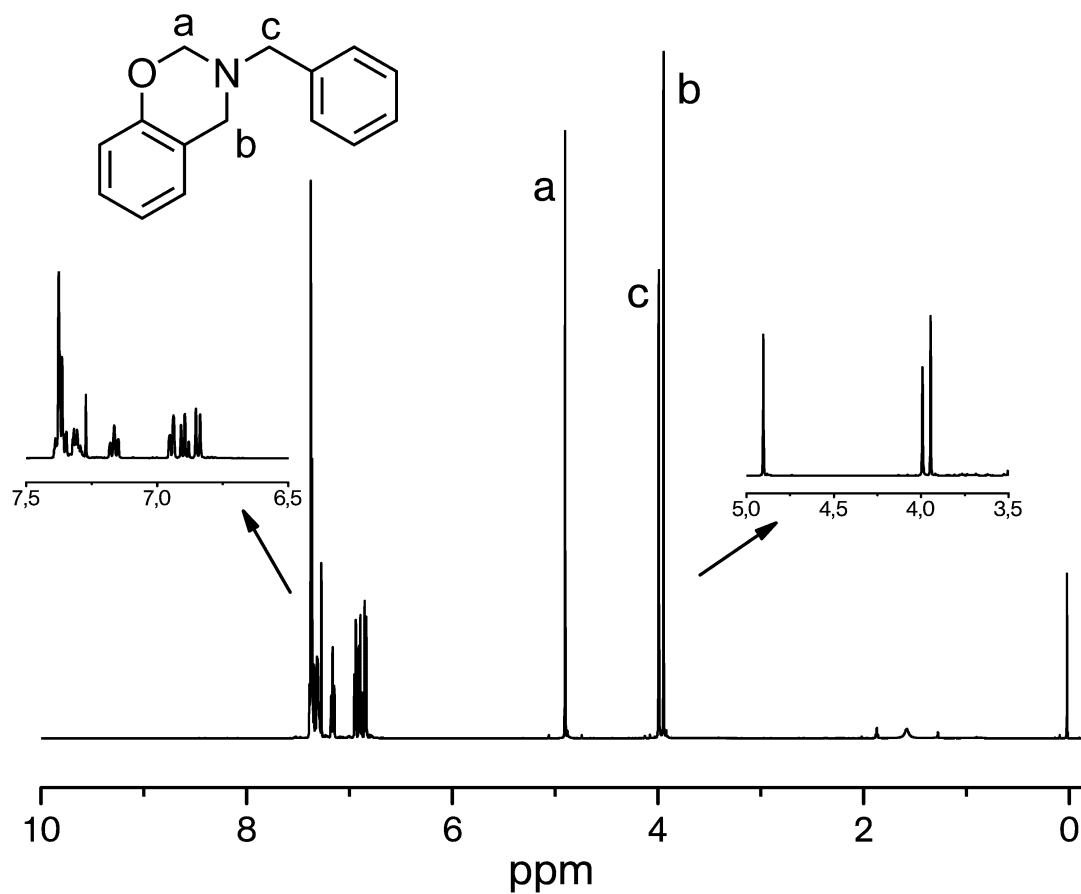

**Figure S1:** <sup>1</sup>H NMR spectrum of P-Bn monomer

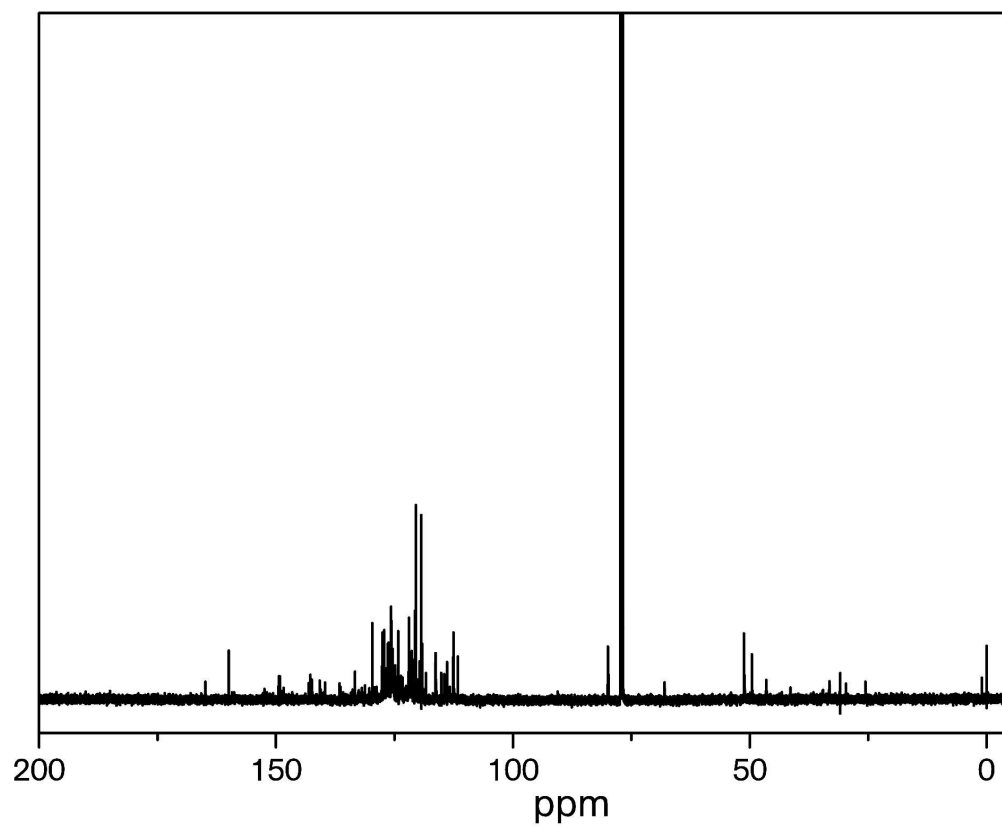

**Figure S2:**  $^{13}\text{C}$  NMR spectrum of Npz-PhOHCl<sub>2</sub> in  $\text{CDCl}_3$

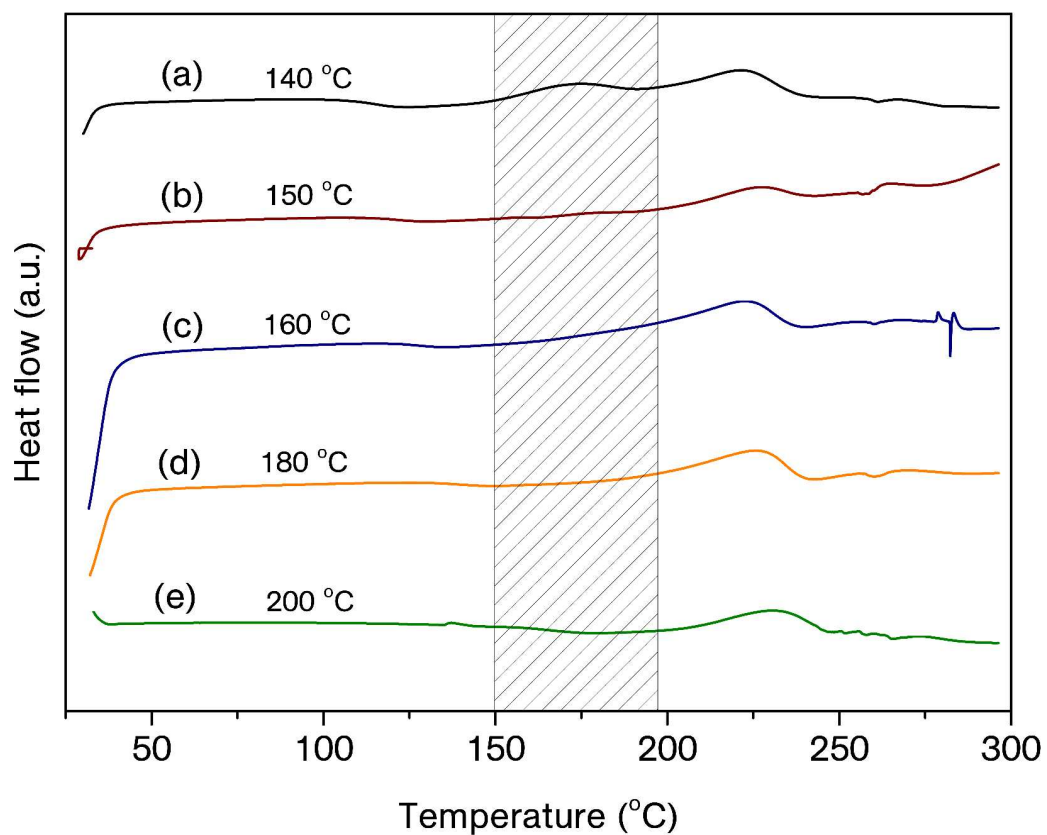

**Figure S3:** Overlaid DSC thermograms of Npz-PhOHCl<sub>2</sub> heated to 140 °C (a), 150 °C (b), 160 °C (c), 180 °C (d), 200 °C (e)

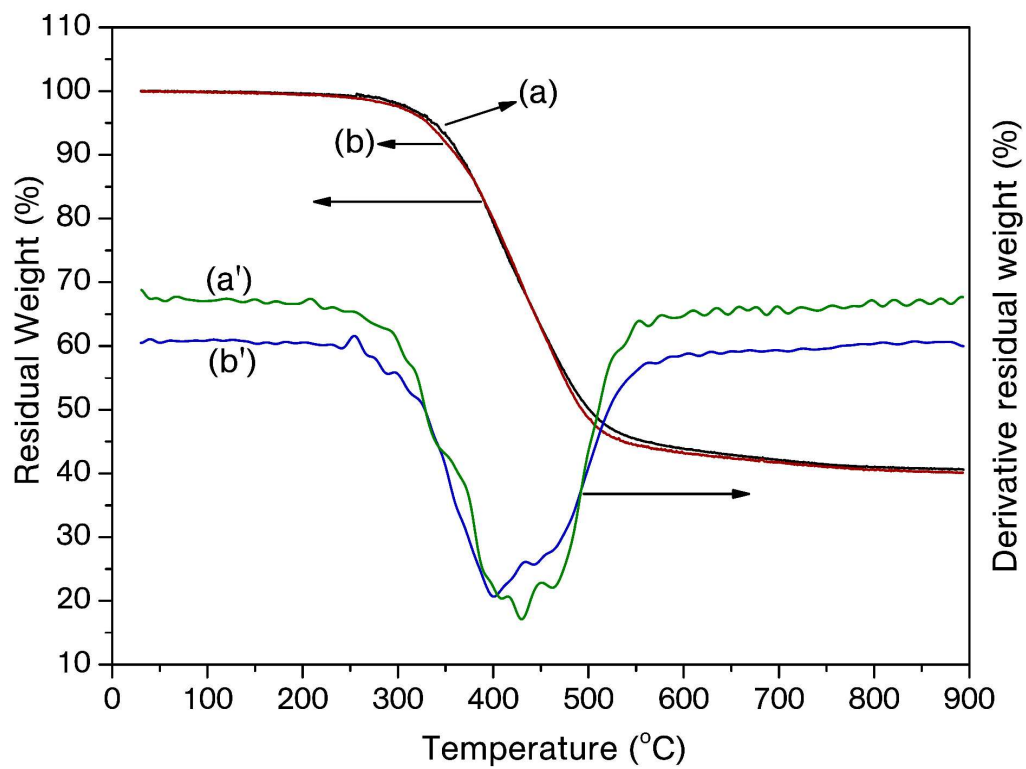

**Figure S4:** TGA traces and their derivatives of cured B-a (a, a') and cured B-a/Npz-PhOHCl<sub>2</sub> (5mol %) (b, b').
